# Supplementary material
Source: publisher figshare collection journal article supplement (https://acs.figshare.com/ndownloader/files/4136182)

# **Eudesmane-type Sesquiterpenoid and Guaianolides from *Kandelia candel* in a Screening Program for Compounds to Overcome TRAIL-resistance**

Tomohiro Minakawa<sup>†</sup>, Kazufumi Toume<sup>†</sup>, Midori A. Arai<sup>†</sup>, Samir Kumar Sadhu<sup>‡</sup>, Firoj Ahmed<sup>§</sup>, and Masami Ishibashi<sup>†\*</sup>

<sup>†</sup>Graduate School of Pharmaceutical Sciences, Chiba University, 1-8-1 Inohana, Chuo-ku, Chiba 260-8675, Japan, <sup>‡</sup>Pharmacy Discipline, Life Science School, Khulna University, Khulna-9208, Bangladesh, <sup>§</sup>Department of Pharmacy, Jagannath University, Dhaka-1100, Bangladesh

## **Supporting information**

### <sup>1</sup>H NMR spectra of compounds **1-4**

|           |                                                              |       |
|-----------|--------------------------------------------------------------|-------|
| Figure S1 | <sup>1</sup> H NMR spectrum of <b>1</b> in CDCl <sub>3</sub> | P. S2 |
| Figure S2 | <sup>1</sup> H NMR spectrum of <b>2</b> in CDCl <sub>3</sub> | P. S3 |
| Figure S3 | <sup>1</sup> H NMR spectrum of <b>3</b> in CDCl <sub>3</sub> | P. S4 |
| Figure S4 | <sup>1</sup> H NMR spectrum of <b>4</b> in CDCl <sub>3</sub> | P. S5 |

Figure S1  $^1\text{H}$  NMR spectrum of **1** in  $\text{CDCl}_3$

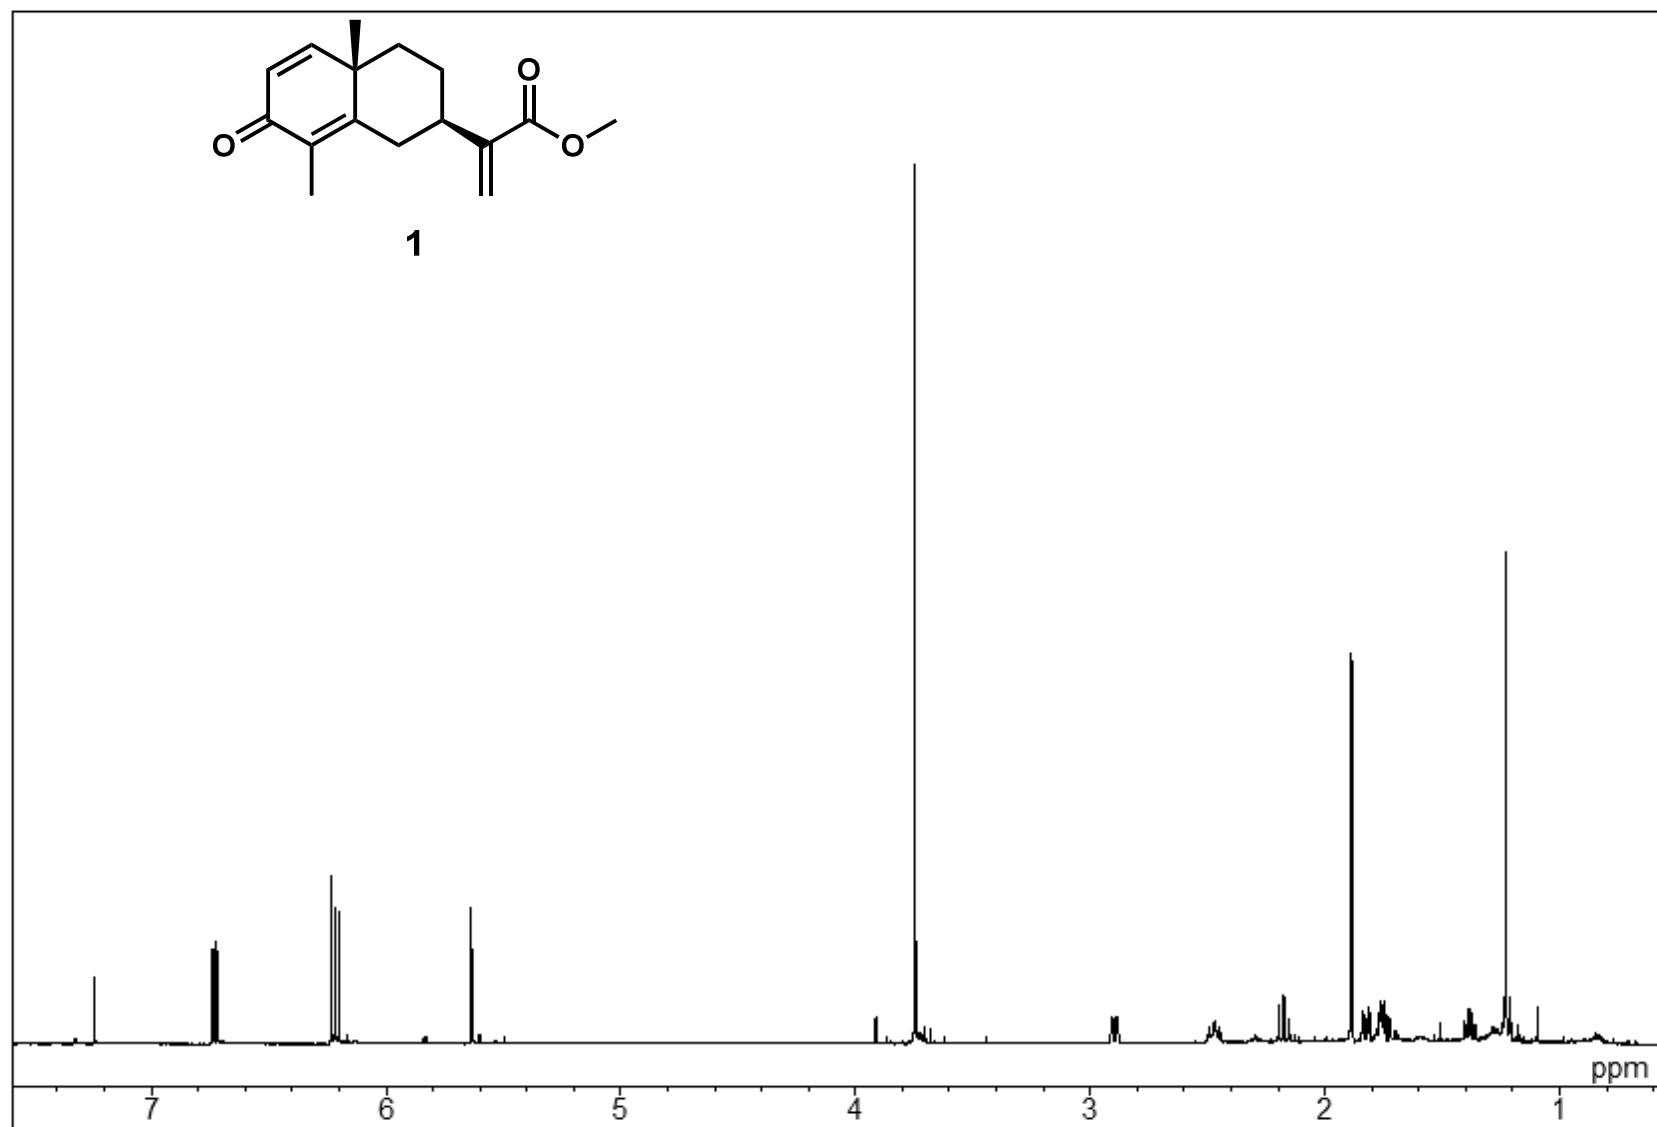

Figure S2  $^1\text{H}$  NMR spectrum of **2** in  $\text{CDCl}_3$

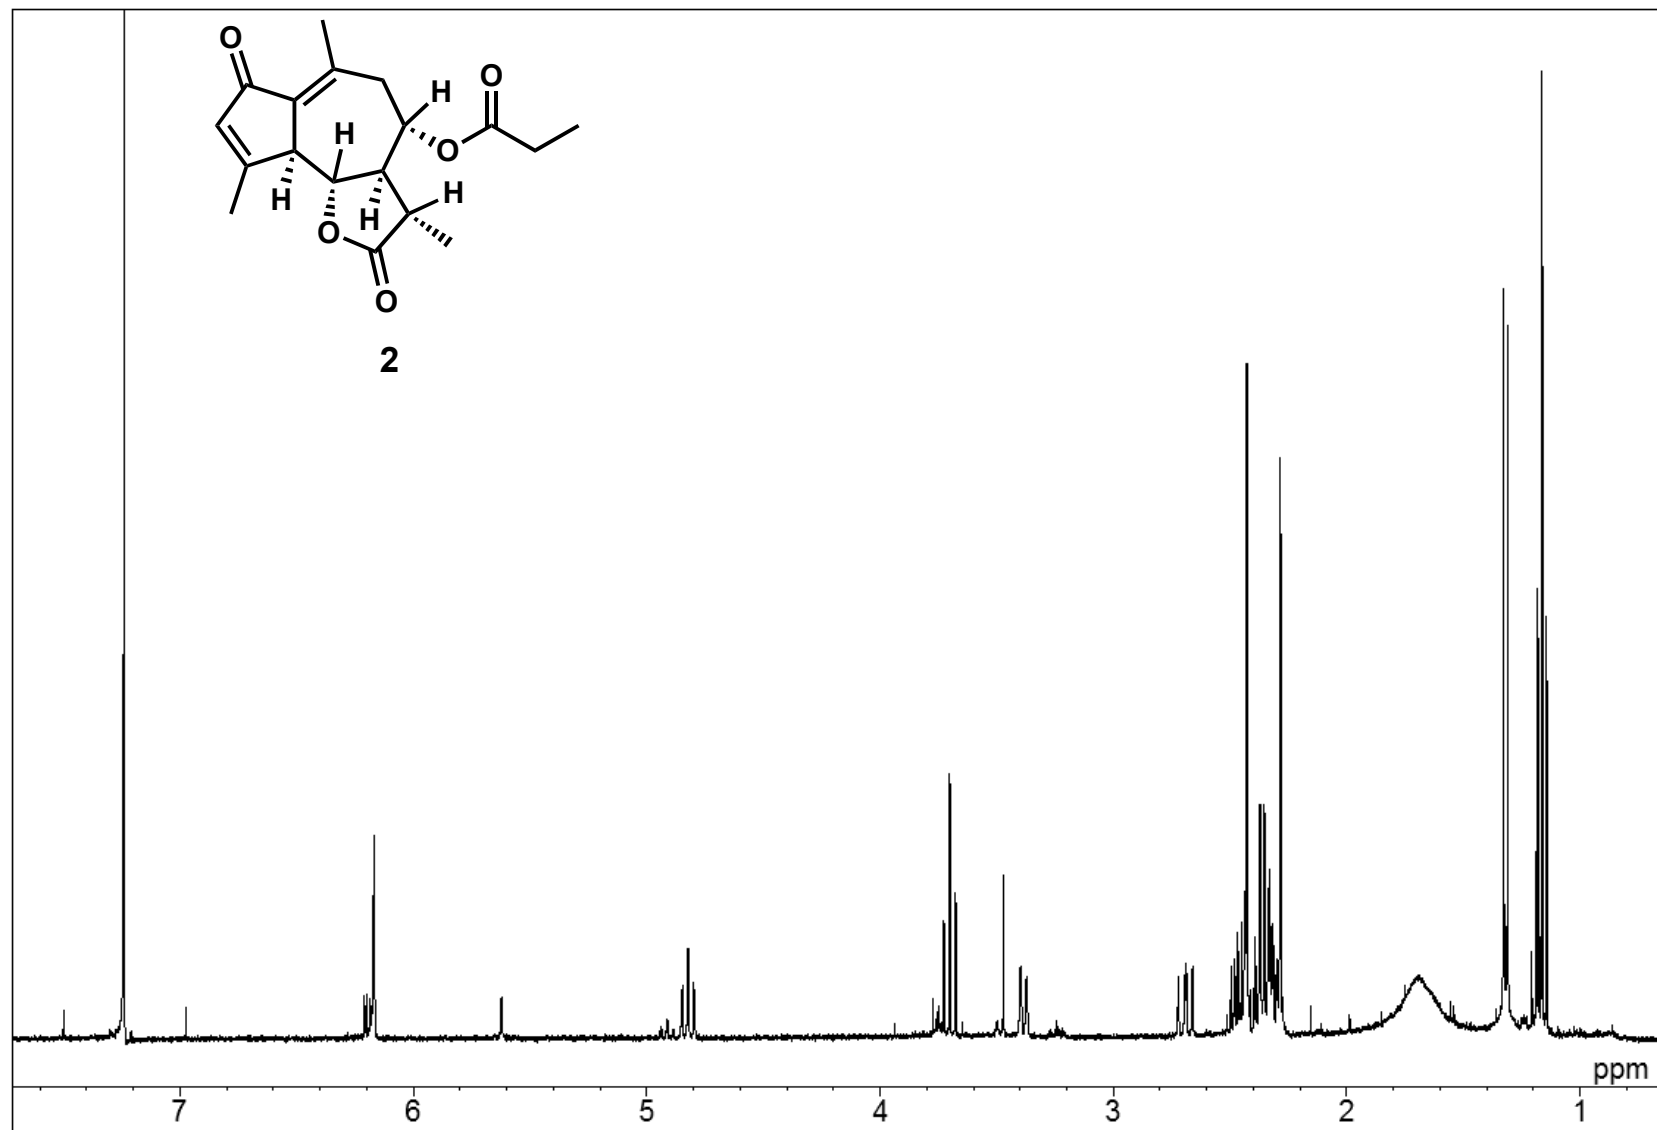

Figure S3  $^1\text{H}$  NMR spectrum of **3** in  $\text{CDCl}_3$

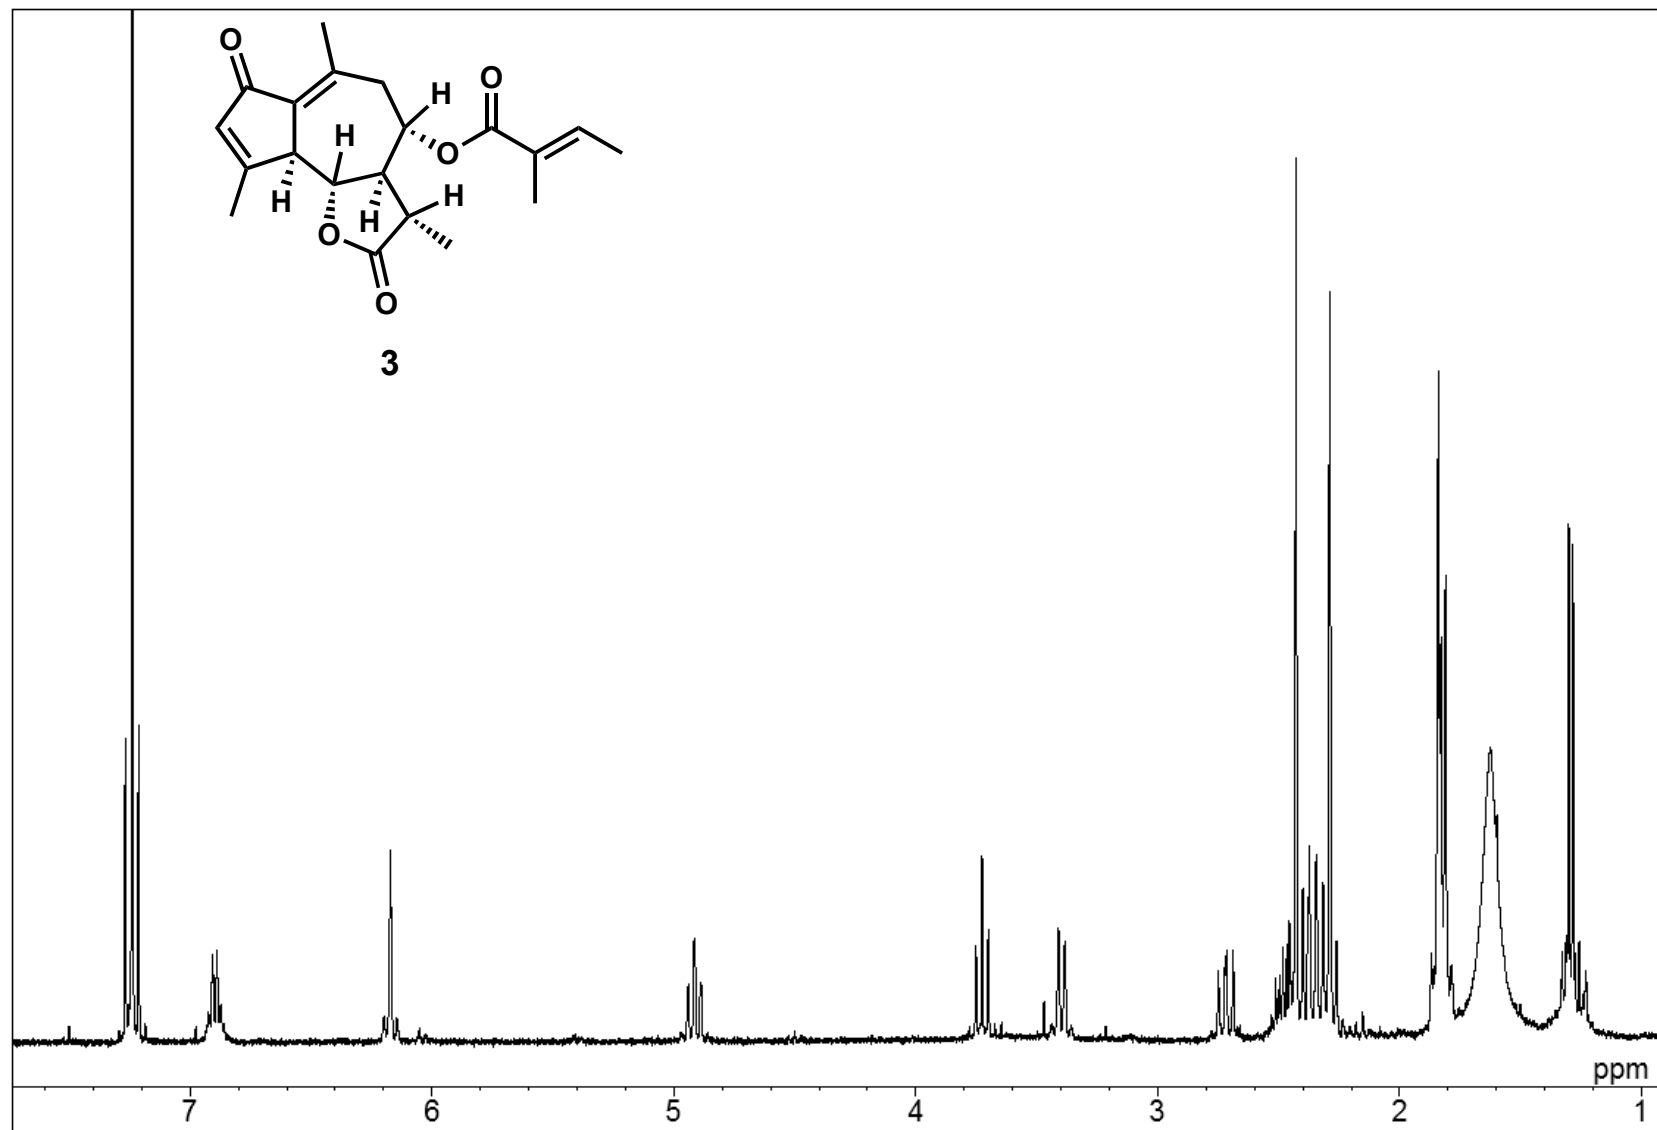

Figure S4  $^1\text{H}$  NMR spectrum of **4** in  $\text{CDCl}_3$

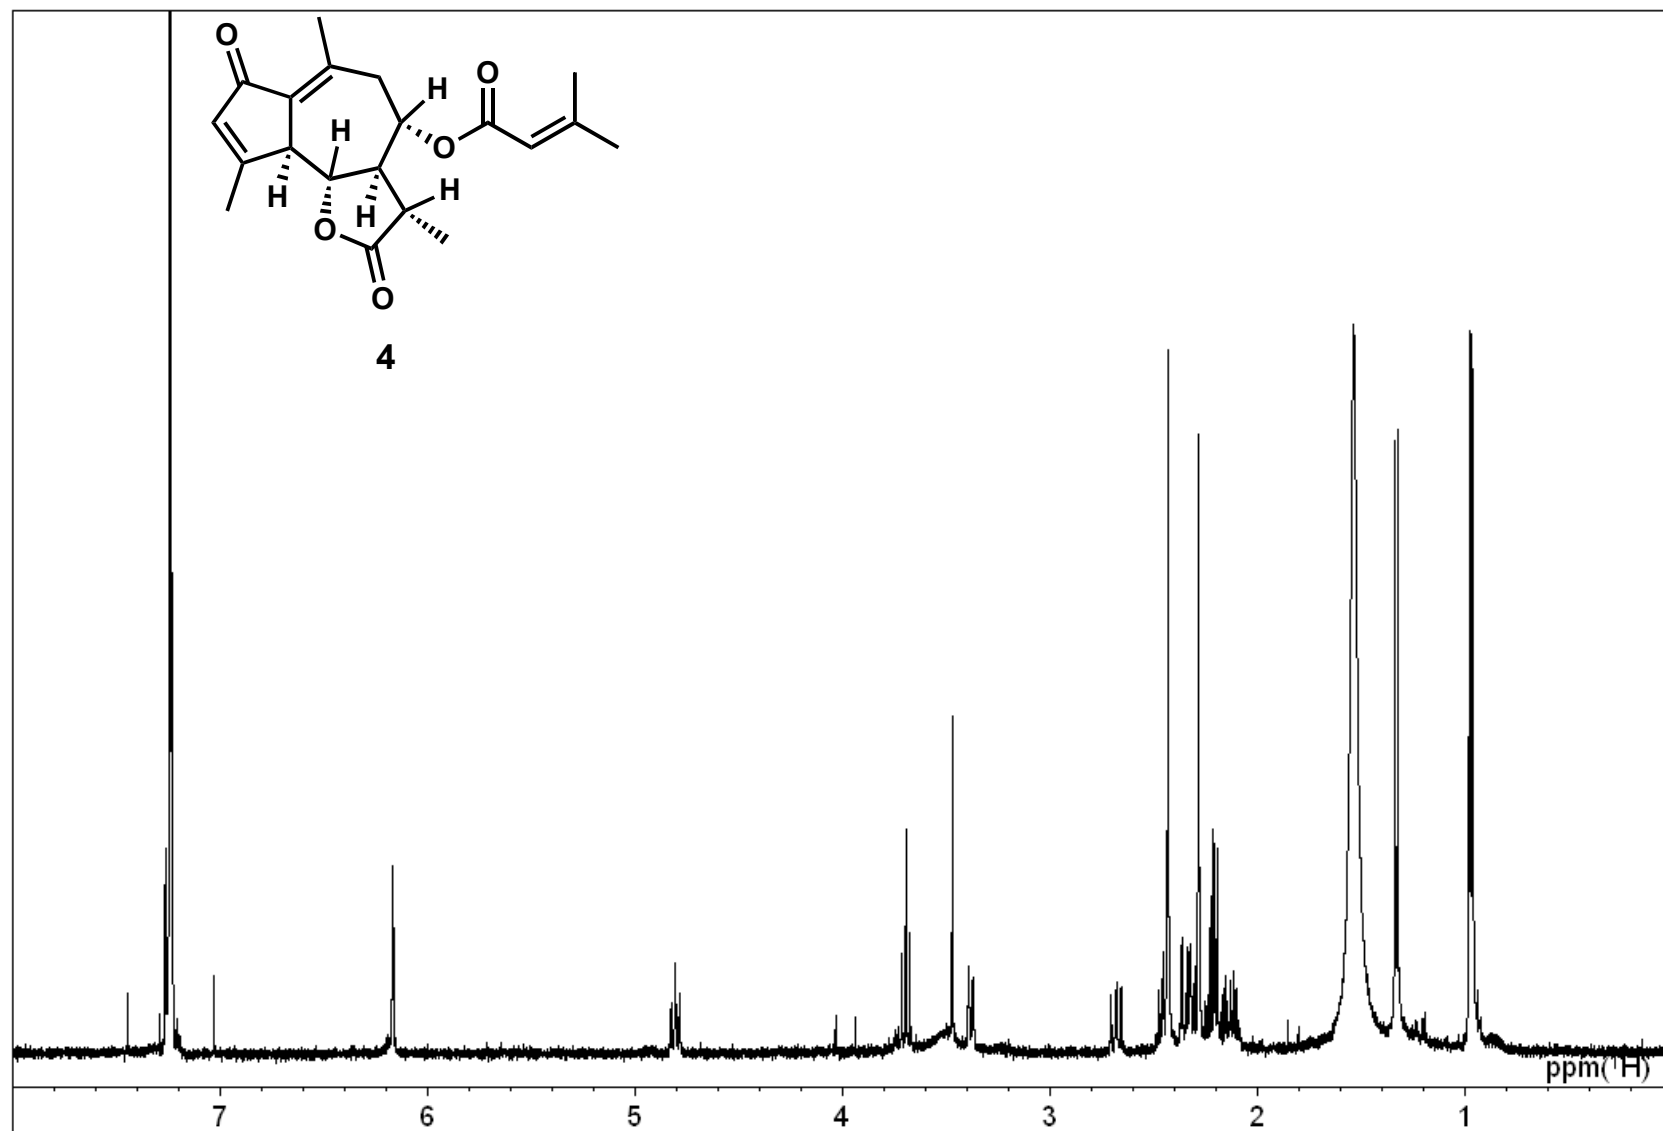

Supplement: Supplementary file 1 [file 4136182]
